# Supplementary material for: Diagnostic Performance of Ultrasonography-Based Risk Models in Differentiating Between Benign and Malignant Ovarian Tumors in a US Cohort
Source: PubMed Central journal article supplement (PMC10346125; doi:10.1001/jamanetworkopen.2023.23289), 2023-07-13
Supplement: jamanetwopen-e2323289-s002.pdf [file jamanetwopen-e2323289-s002.pdf]

## Data Sharing Statement

Yoeli-Bik. Diagnostic Performance of Ultrasonography-Based Risk Models in Differentiating Between Benign and Malignant Ovarian Tumors in a US Cohort. *JAMA Netw Open*. Published July 13, 2023. doi:10.1001/jamanetworkopen.2023.23289

### Data

**Data available:** No
